# Supplementary material for: A brain-wide analysis maps structural evolution to distinct anatomical module
Source: eLife journal article supplement (doi:10.7554/elife.80777), 2023-07-27
Supplement: supp [file elife-80777-supp-v1.zip]

**a Image Anatomy**

**b tERK staining and 2-P**

**c Automated segmentation**

**d Transform atlas into four anatomical scales of segmentation.**

**e Measure segments and statistically compare volume in cobraZ**

Surface

Cave

**Statistical comparison of volume in cobraZ**

| Region         | Condition | % of Total Brain Volume (approx. median) |
|----------------|-----------|------------------------------------------|
| Olfactory Bulb | S         | 1.5                                      |
|                | C         | 1.8                                      |
|                | SxCF2     | 1.7                                      |
| Pallium        | S         | 5.0                                      |
|                | C         | 6.0                                      |
|                | SxCF2     | 5.5                                      |
| Subpallium     | S         | 2.2                                      |
|                | C         | 2.5                                      |
|                | SxCF2     | 2.3                                      |
