# Supplementary figures and images for: A brain-wide analysis maps structural evolution to distinct anatomical module
Source: eLife journal article supplement (doi:10.7554/elife.80777), 2023-07-27

Figure 5 - Supplemental 4

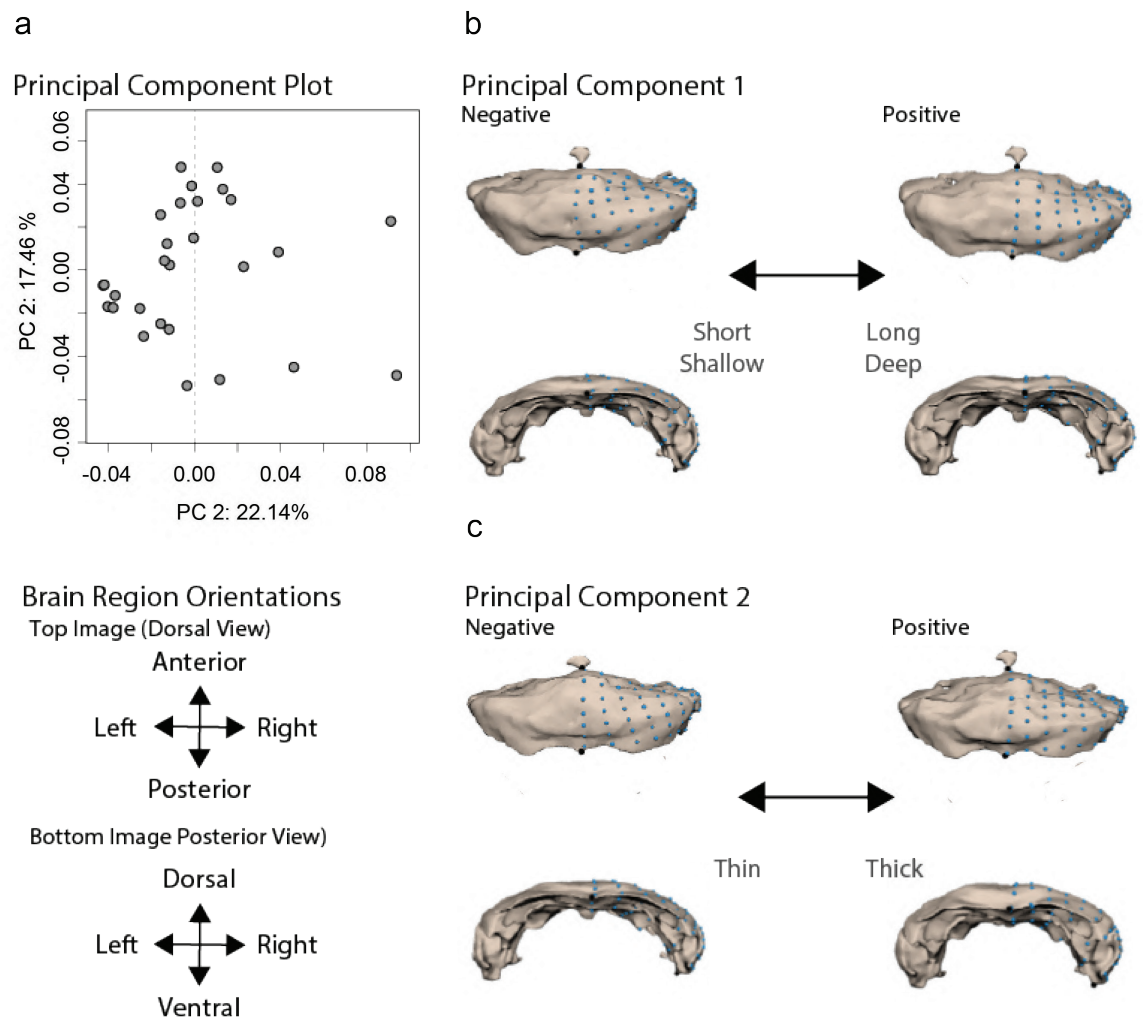

Supplement: supp [file elife-80777-supp-v1.zip]

Figure 5 - Supplemental 1

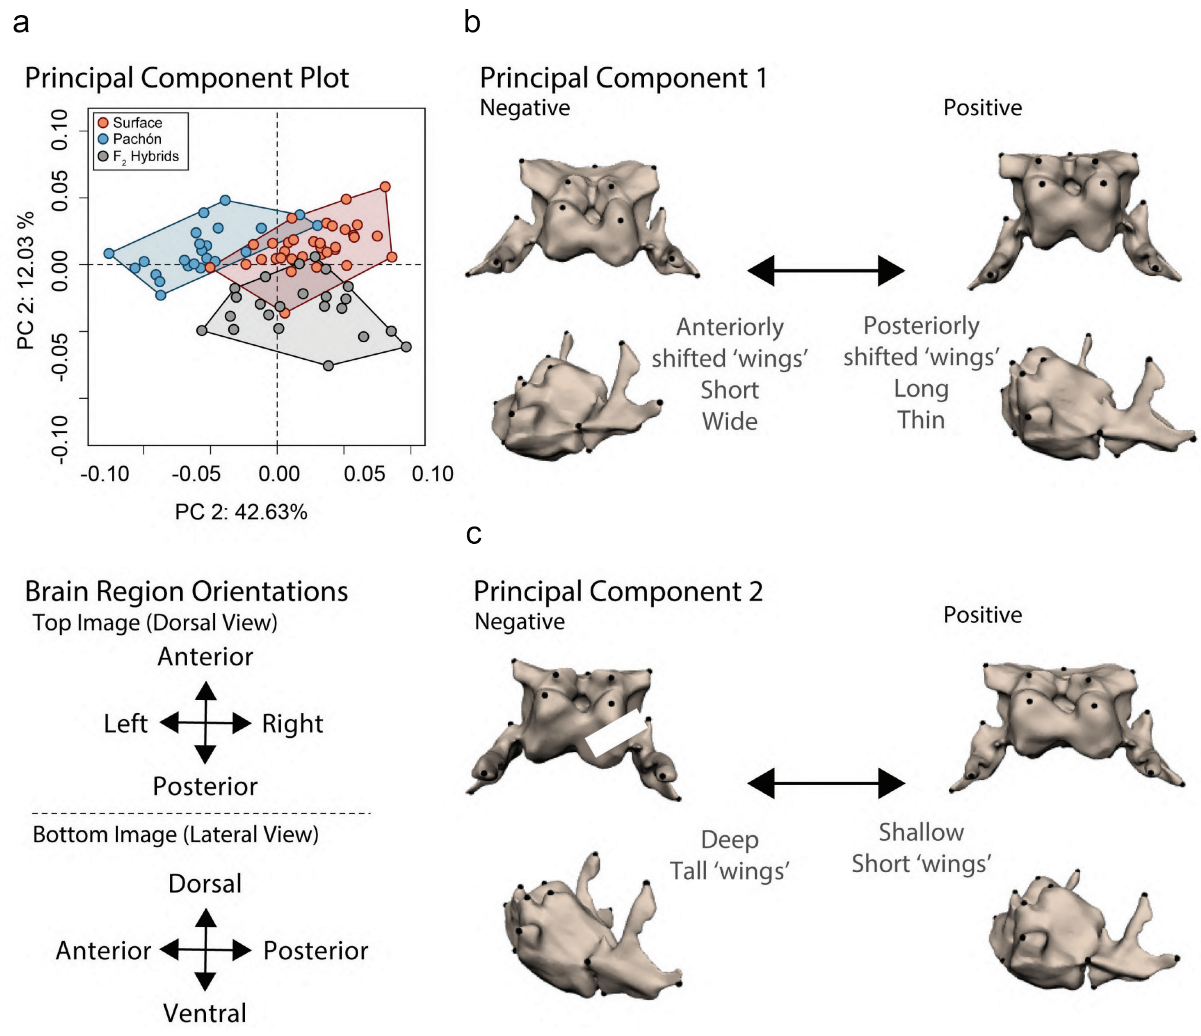

Supplement: supp [file elife-80777-supp-v1.zip]

Figure 1 - Supplemental 2

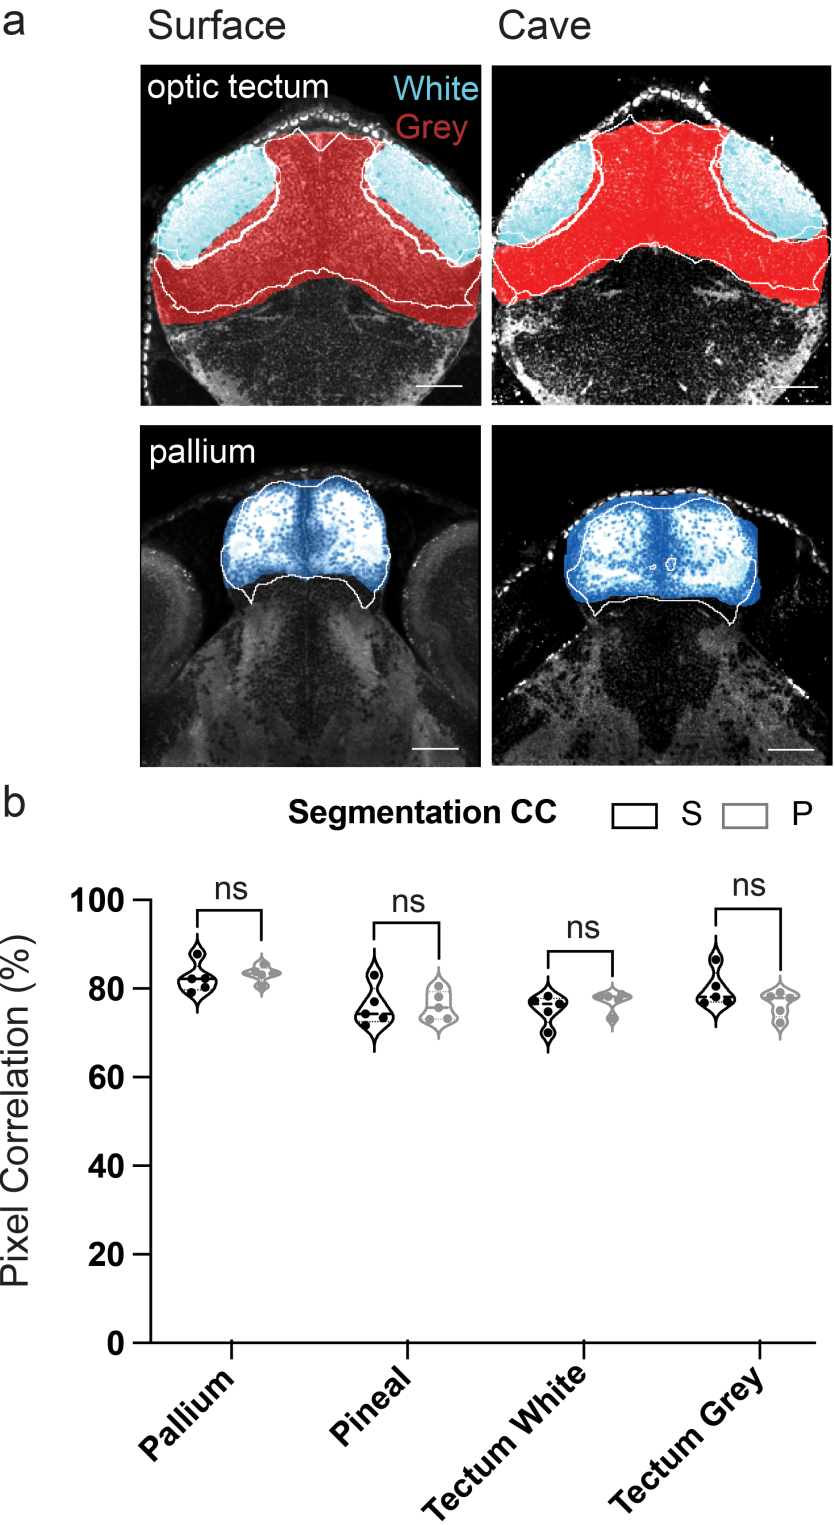

Supplement: supp [file elife-80777-supp-v1.zip]

Figure 2 - Supplemental 1

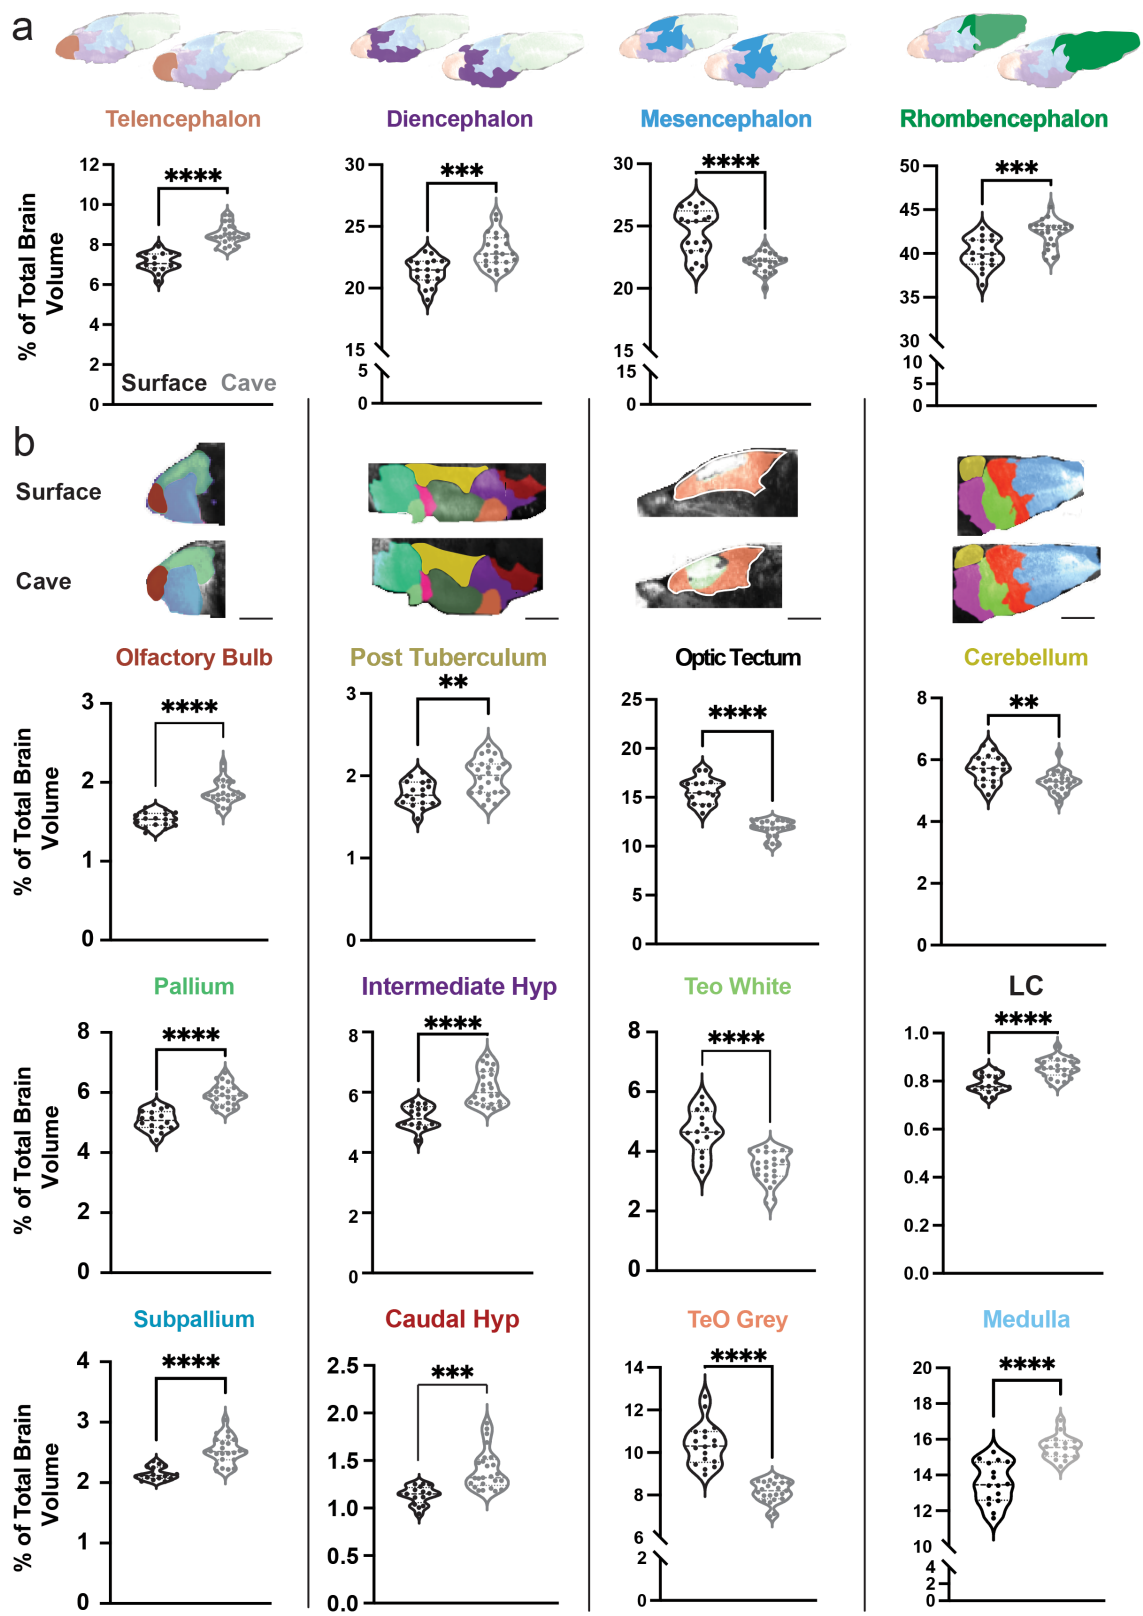

Supplement: supp [file elife-80777-supp-v1.zip]

Figure 5 - Supplemental 3

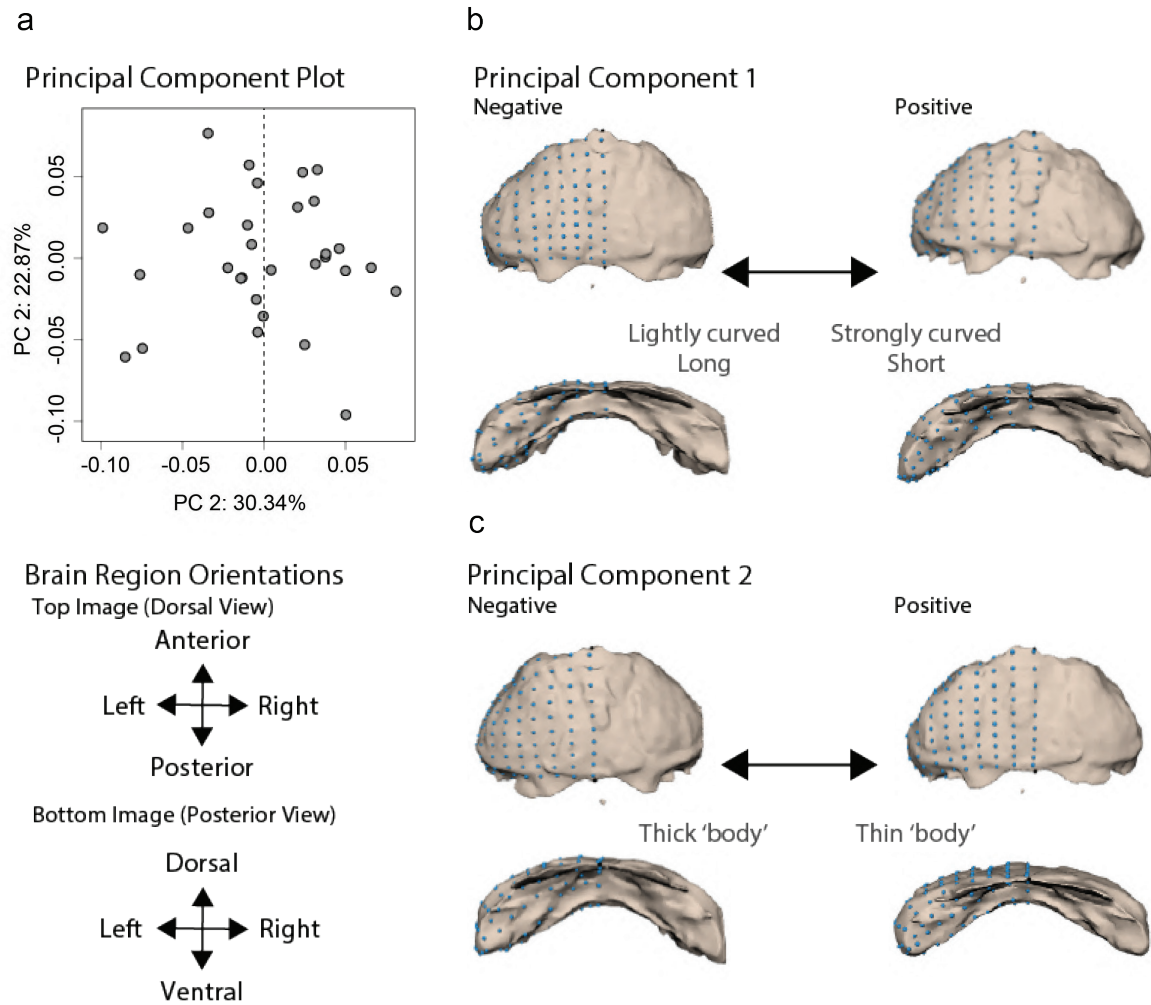

Supplement: supp [file elife-80777-supp-v1.zip]

Figure 3 - Supplemental 2

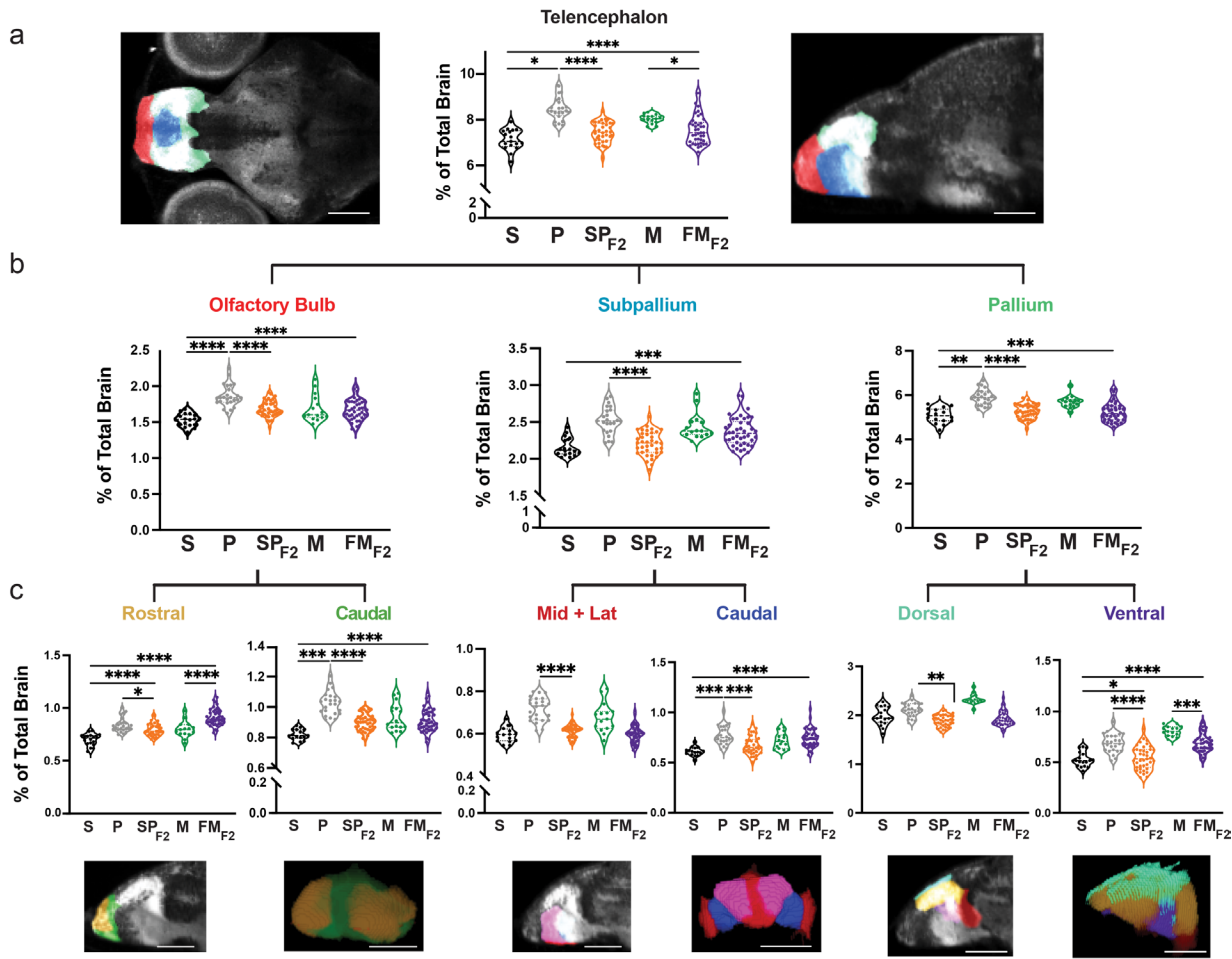

Supplement: supp [file elife-80777-supp-v1.zip]

Figure 4 - Supplemental 1

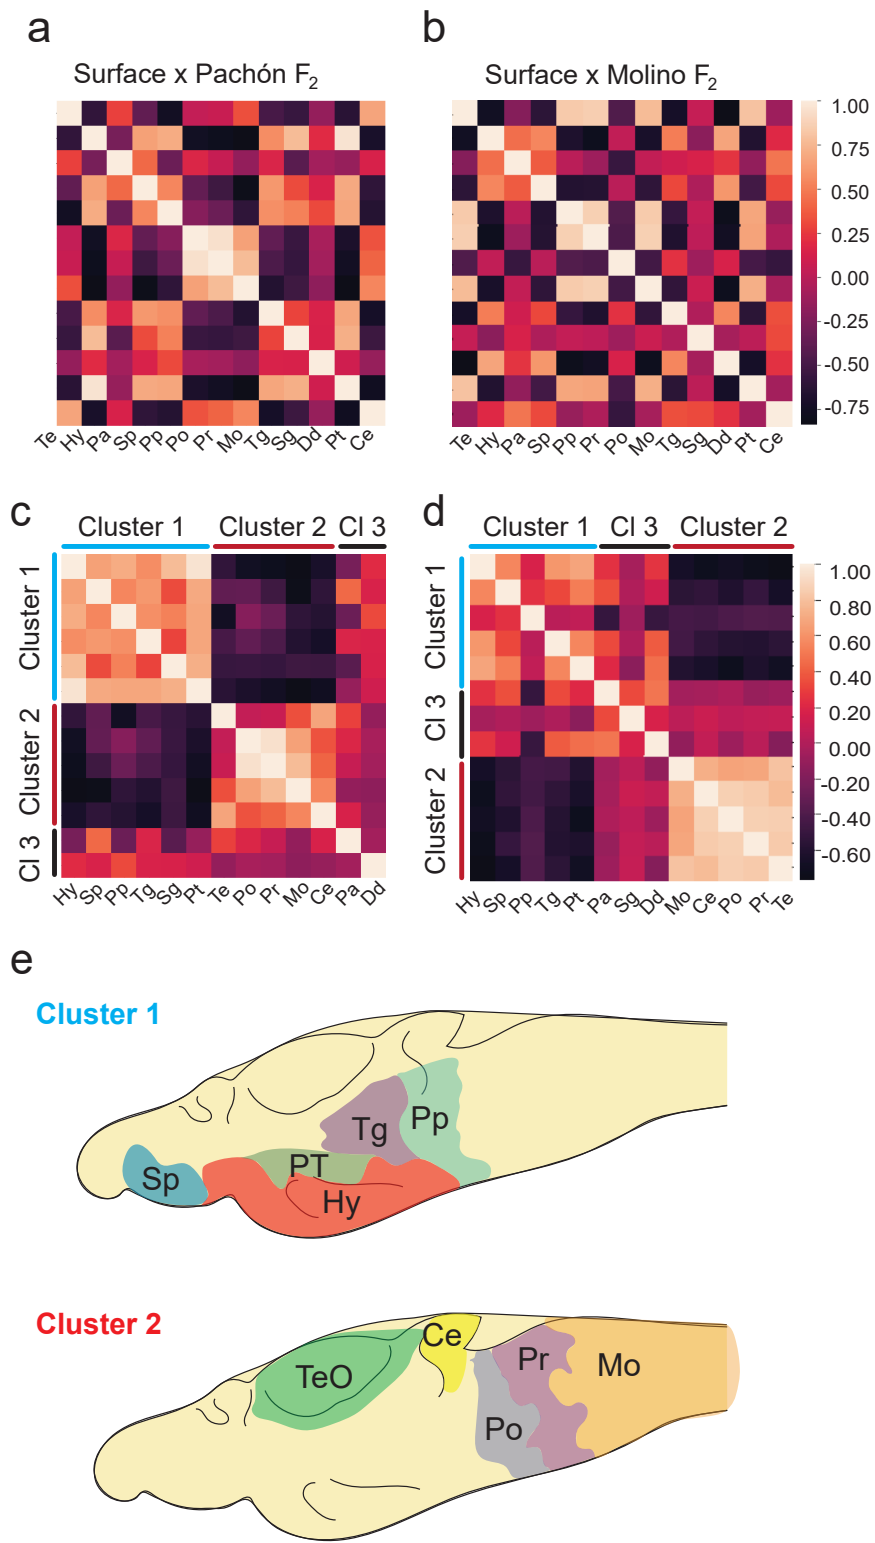

Supplement: supp [file elife-80777-supp-v1.zip]

Figure 5 - Supplemental 2

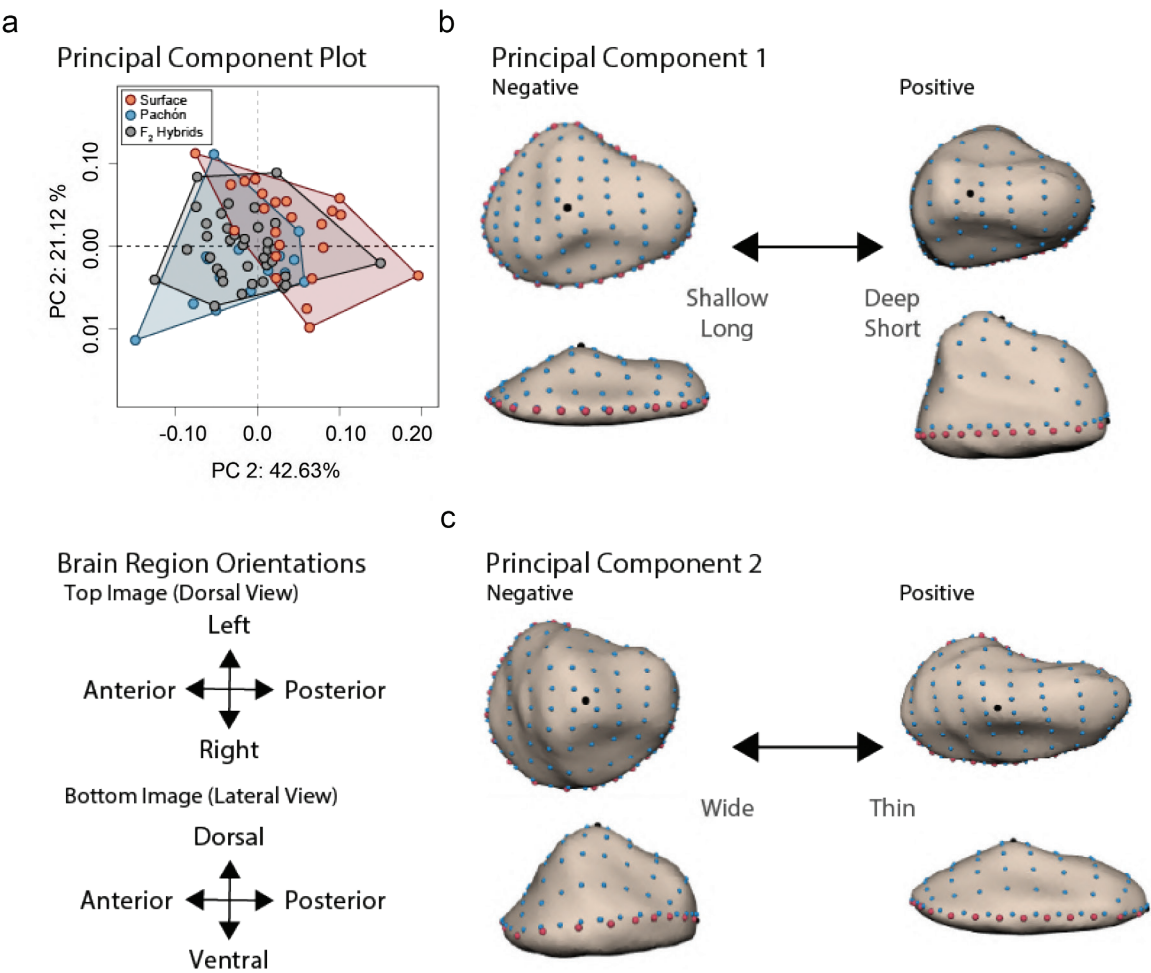

Supplement: supp [file elife-80777-supp-v1.zip]

Figure 5 - Supplemental 5

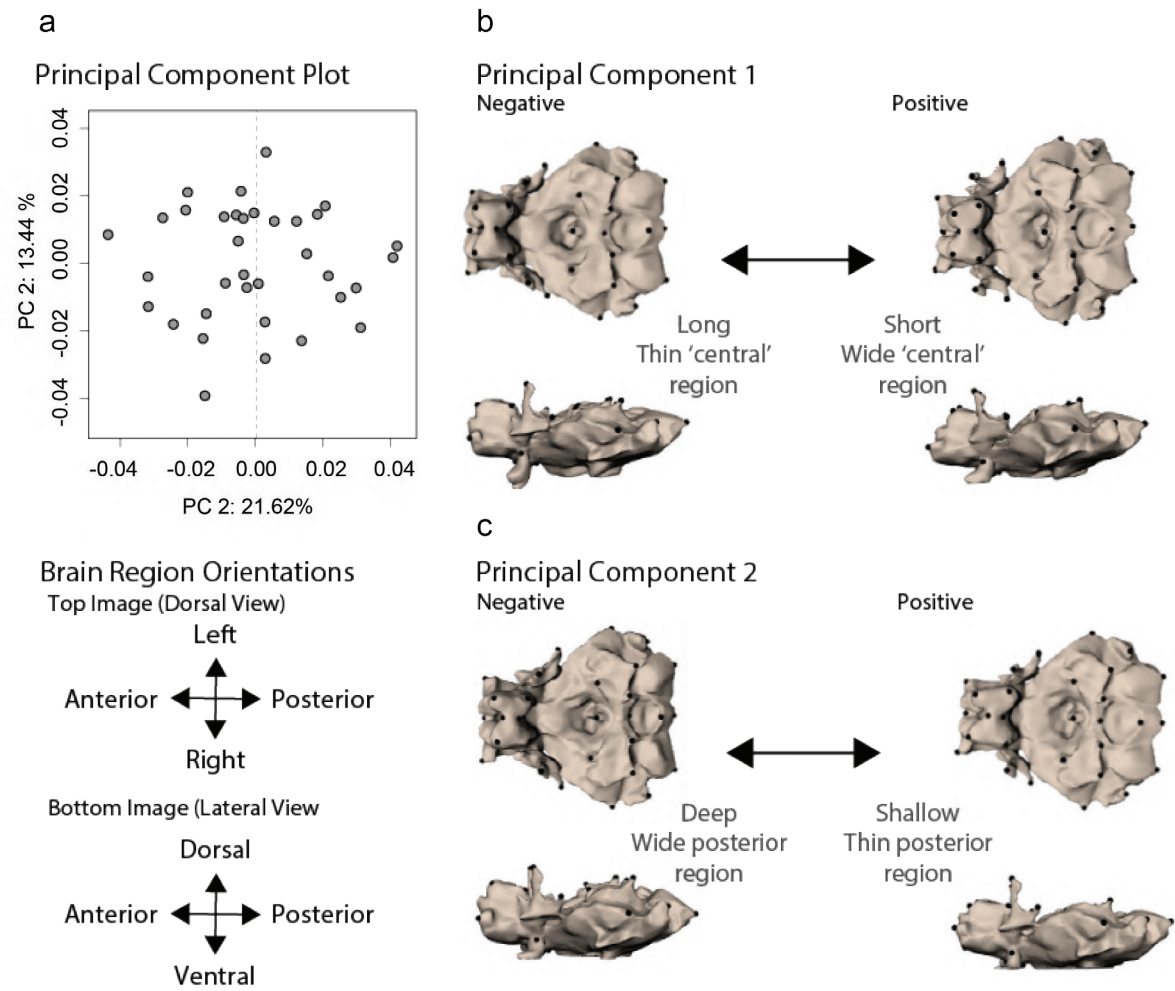

Supplement: supp [file elife-80777-supp-v1.zip]

Figure 5 - Supplemental 6

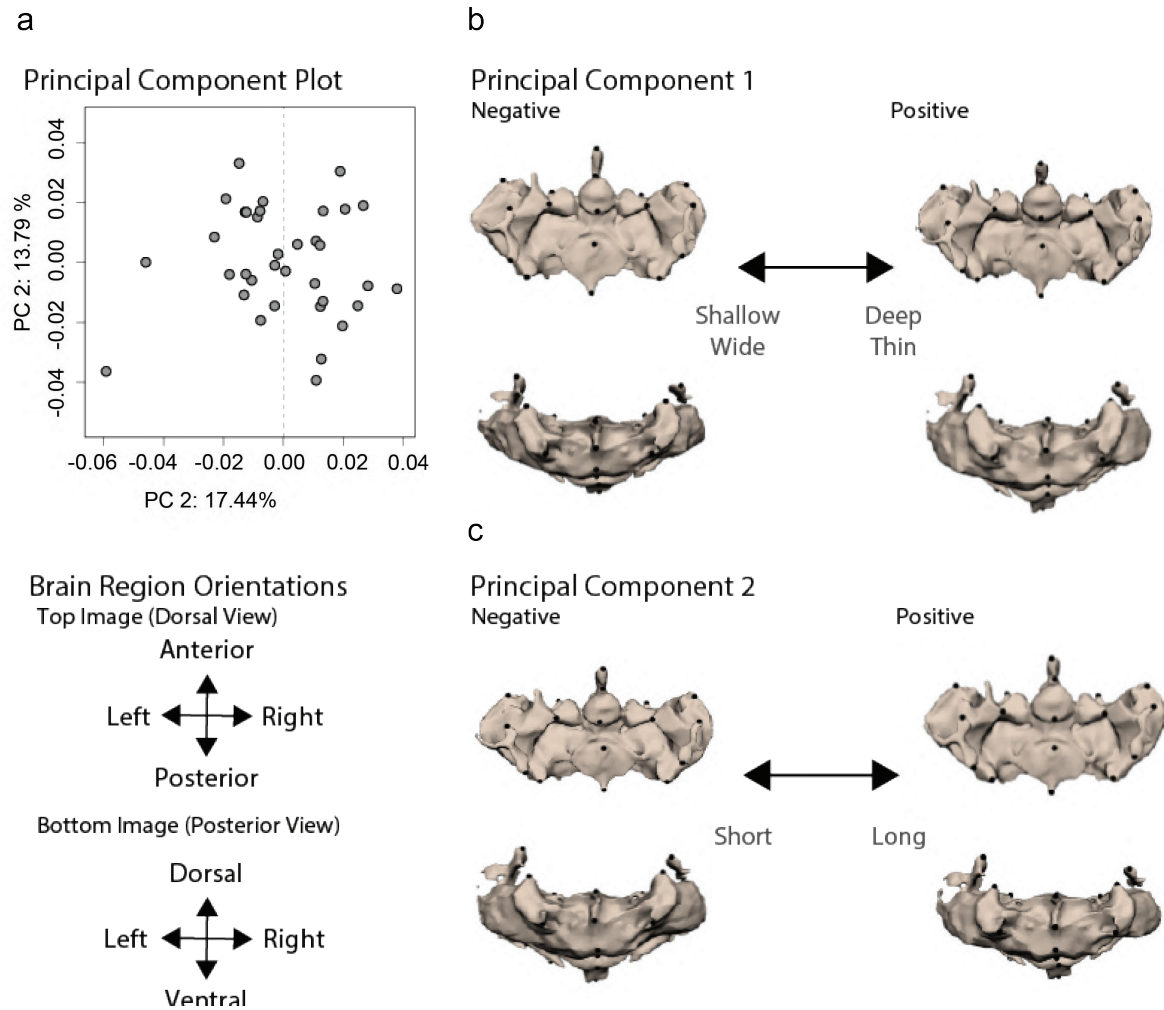

Supplement: supp [file elife-80777-supp-v1.zip]

Figure 3 - Supplemental 1

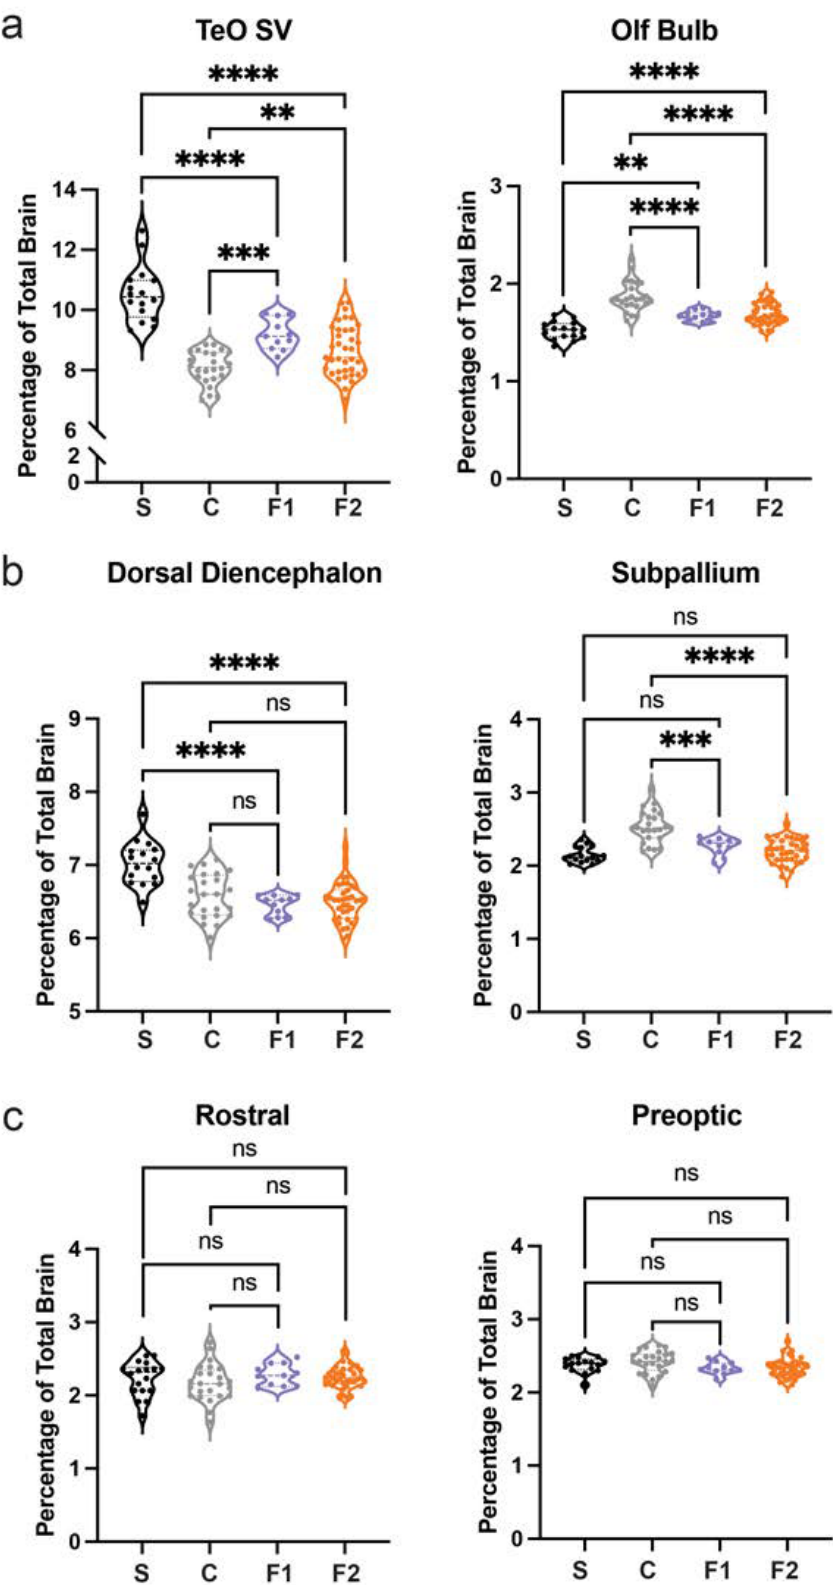

Supplement: supp [file elife-80777-supp-v1.zip]
